# Supplementary material for: Effectiveness of pembrolizumab in trial-ineligible patients with metastatic urothelial carcinoma
Source: Research Square preprint supplement (doi:10.21203/rs.3.rs-1576583/v1), 2022-04-25
Supplement: Supplementary file 1 [file 358faf2de5c4a9488d390ed8.xlsx]

## Sheet: Sheet1
Table 2. Violation of eligibility criteria of KEYNOTE-045
Characteristic	N = 2221
Patients without urothelial carcinoma histology	7 (3.2)
Patients had not had progression of urothelial cancer following receipt of a firstline platinum-containing regimen	58 (26.1)
Patients received adjuvant platinum-containing therapy following cystectomy for localized muscle-invasive urothelial cancer, with recurrence/progression after 12 months following completion of therapy.	2 (0.9)
Patients received neoadjuvant platinum-containing therapy prior to cystectom for localized muscle-invasive urothelial cancer, with recurrence after 12 months following completion of therapy.	10 (4.5)
Patients who did not have a performance status of 0, 1, or 2 on the ECOG Performance Scale, as assessed within 10 days prior to treatment initiation. Subjects with anECOG performance status of 2 must have a hemoglobin ≥10g/dL, must not have liver metastases, and must have received the last dose of their last prior chemotherapy regimen.	15 (6.8)
Patients receiving platinum-base chemotherapy other than cisplatin or carboplatin as a first-line therapy	7 (3.2)
Patients with NYHA class 3 or more congestive heart failure, or left ventricular ejection fraction of < 40%	8 (3.6)
Patients who has evidence of interstitial lung disease or active non-infectious pneumonitis	2 (0.9)
Patients who were receiving systemic steroid therapy or any other form of immunosuppressive therapy.	12 (5.4)
Patients with a syndrome that requires systemic or immunosuppressive agents	2 (0.9)
Neutrophil count of less than 1500/mcL	5 (2.3)
Platelet count of less than 100,000/mcL	7 (3.2)
Hemoglobin concentration of less than 9.0 g/dL	32 (14.4)
Estimated GFR of ≤1.5x ULN or ≥30 mL/min for subjects with creatinine levels >1.5x institutional ULN	28 (12.6)
1n (%)
ECOG; eastern cooperative oncology group, NYHA; New York Heart Association; GFR; glomerular filtration rate, ULN; upper limits of normal
