# Supplementary material for: Effectiveness of pembrolizumab in trial-ineligible patients with metastatic urothelial carcinoma
Source: Research Square preprint supplement (doi:10.21203/rs.3.rs-1576583/v1), 2022-04-25
Supplement: Supplementary file 2 [file 38b356ad88343be8e6a92c80.xlsx]

## Sheet: Sheet1
Table 1. Patient characteristics of unweighted and weighted population
		Unweighted populationa				Weighted populationb
Characteristic	Overall, N = 222	Eligible, N = 89	Ineligible, N = 133	SMD		Eligible	Ineligible	SMD
Age at baseline, year (mean [SD])	71.7 (9.4)	72.0 (8.4)	71.6 (10.1)	0.04		72.2 (8.0)	72.0 (9.8)	0.02
Sex				0.05				0.02
Male	165 (74.3)	65 (73.0)	100 (75.2)			73.4	74.3
Female	57 (25.7)	24 (27.0)	33 (24.8)			26.6	25.7
ECOG performance status				0.3				0.05
0	105 (47.3)	50 (56.2)	55 (41.4)			51.3	49
1 or more	117 (52.7)	39 (43.8)	78 (58.6)			48.7	51
Body mass index, kg/m2 (mean [SD])	21.9 (3.6)	22.7 (3.8)	21.3 (3.3)	0.39		21.7 (3.8)	21.9 (3.4)	0.04
Smoking status				0.06				0.03
Former or current	126 (56.8)	52 (58.4)	74 (55.6)			55.2	56.7
Never	96 (43.2)	37 (41.6)	59 (44.4)			44.8	43.3
Previous radical surgery	138 (62.2)	60 (67.4)	78 (58.6)	0.18		65.9	63.1	0.06
Primary location of tumor				0.01				0
Lower tract	118 (53.2)	47 (52.8)	71 (53.4)			53.4	53.4
Upper tract	104 (46.8)	42 (47.2)	62 (46.6)			46.6	46.6
Location of metastasis				0.19				0.03
LN and visceral metastasis	87 (39.2)	30 (33.7)	57 (42.9)			40.1	38.7
LN or visceral metastasis	135 (60.8)	59 (66.3)	76 (57.1)			59.9	61.3
Liver metastasis	43 (19.4)	14 (15.7)	29 (21.8)	0.16		18.2	19	0.02
Platinum				0.33				0.02
Other platinum	70 (31.5)	20 (22.5)	50 (37.6)			31.7	30.9
Cisplatin	152 (68.5)	69 (77.5)	83 (62.4)			68.3	69.1
Most recent chemotherapy				0.23				0.01
Perioperative	54 (24.3)	27 (30.3)	27 (20.3)			24	24.5
Salvage	168 (75.7)	62 (69.7)	106 (79.7)			76	75.5
Concomitant proton pump inhibitor use	91 (41.0)	31 (34.8)	60 (45.1)	0.21		38.5	40.2	0.04
Previous antibiotic use	39 (17.6)	13 (14.6)	26 (19.5)	0.13		20.8	18.3	0.06
Baseline neutrophil-to-lymphocyte ratio (mean [SD])	4.5 (3.8)	4.4 (3.8)	4.6 (3.8)	0.05		4.7 (4.0)	4.5 (3.7)	0.05
SMD; standardized mean difference, ECOG; eastern cooperative oncology group, LN; lymph node, SD; standard deviation
a: Data are presented as number (percentage) of patients
b: Data are presented as percentage of patients
