# Supplementary material for: Effectiveness of pembrolizumab in trial-ineligible patients with metastatic urothelial carcinoma
Source: Research Square preprint supplement (doi:10.21203/rs.3.rs-1576583/v1), 2022-04-25
Supplement: Supplementary file 3 [file 85d357c4e71cdcc3a55cac0f.xlsx]

## Sheet: Sheet1
Table 3. Multivariable logistic regression analysis for predicting trial-ineligiblity for KEYNOTE-045
Characteristic	OR (95% CI)	P Value
Age at baseline, year	0.99 (0.95 to 1.02)	0.37
Sex
Male	—
Female	0.81 (0.40 to 1.64)	0.55
ECOG performance status
0	—
1 or more	1.62 (0.90 to 2.93)	0.11
Body mass index	0.91 (0.83 to 0.99)	0.026
Smoking status
Former or current	—
Never	1.06 (0.56 to 2.04)	0.85
Previous radical surgery
No	—
Yes	0.94 (0.49 to 1.80)	0.84
Primary location of tumor
Lower tract	—
Upper tract	0.83 (0.45 to 1.51)	0.54
Location of metastasis
LN and visceral metastasis	—
LN or visceral metastasis only	0.78 (0.42 to 1.44)	0.43
Liver metastasis
No	—
Yes	1.18 (0.55 to 2.62)	0.68
Platinum
Carboplatin	—
Cisplatin	0.48 (0.24 to 0.91)	0.028
Most recent chemotherapy
Perioperative	—
Salvage	1.57 (0.76 to 3.26)	0.22
Concomitant proton pump inhibitor use
No	—
Yes	1.41 (0.77 to 2.59)	0.27
Previous antibiotic use
No	—
Yes	1.30 (0.59 to 2.95)	0.52
Baseline neutrophil-to-lymphocyte ratio	0.99 (0.91 to 1.07)	0.73
OR; odds ratio, CI; confidence interval, ECOG; eastern cooperative oncology group,
LN; lymph node
