# Supplementary figures and images for: Effectiveness of pembrolizumab in trial-ineligible patients with metastatic urothelial carcinoma
Source: Research Square preprint supplement (doi:10.21203/rs.3.rs-1576583/v1), 2022-04-25

Progression-free survival

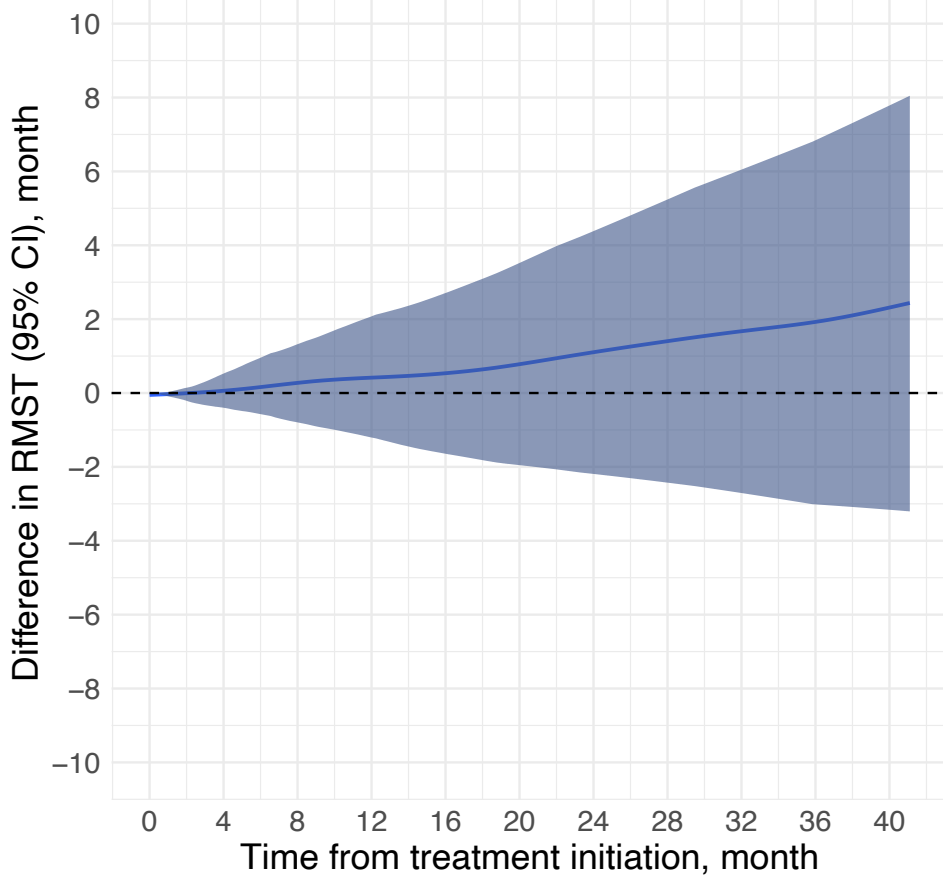

Overall survival

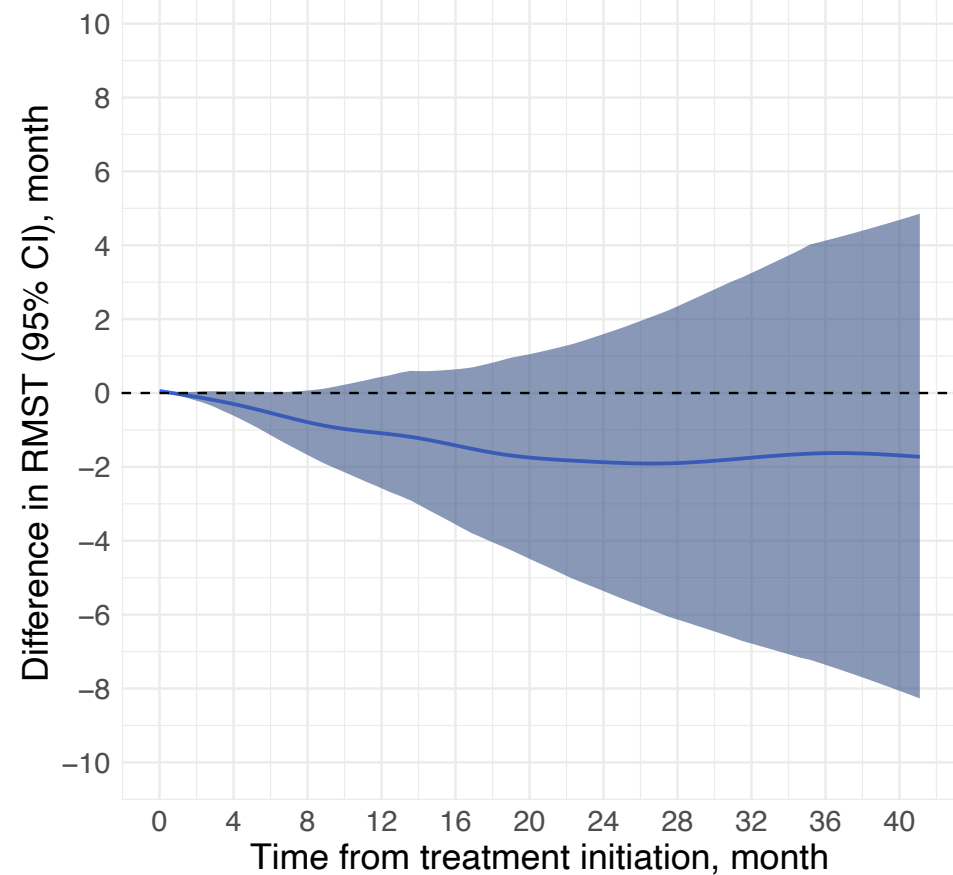

Supplement: Supplementary file 1 [file 1e1dfb134d59f37ea350a68a.pdf]

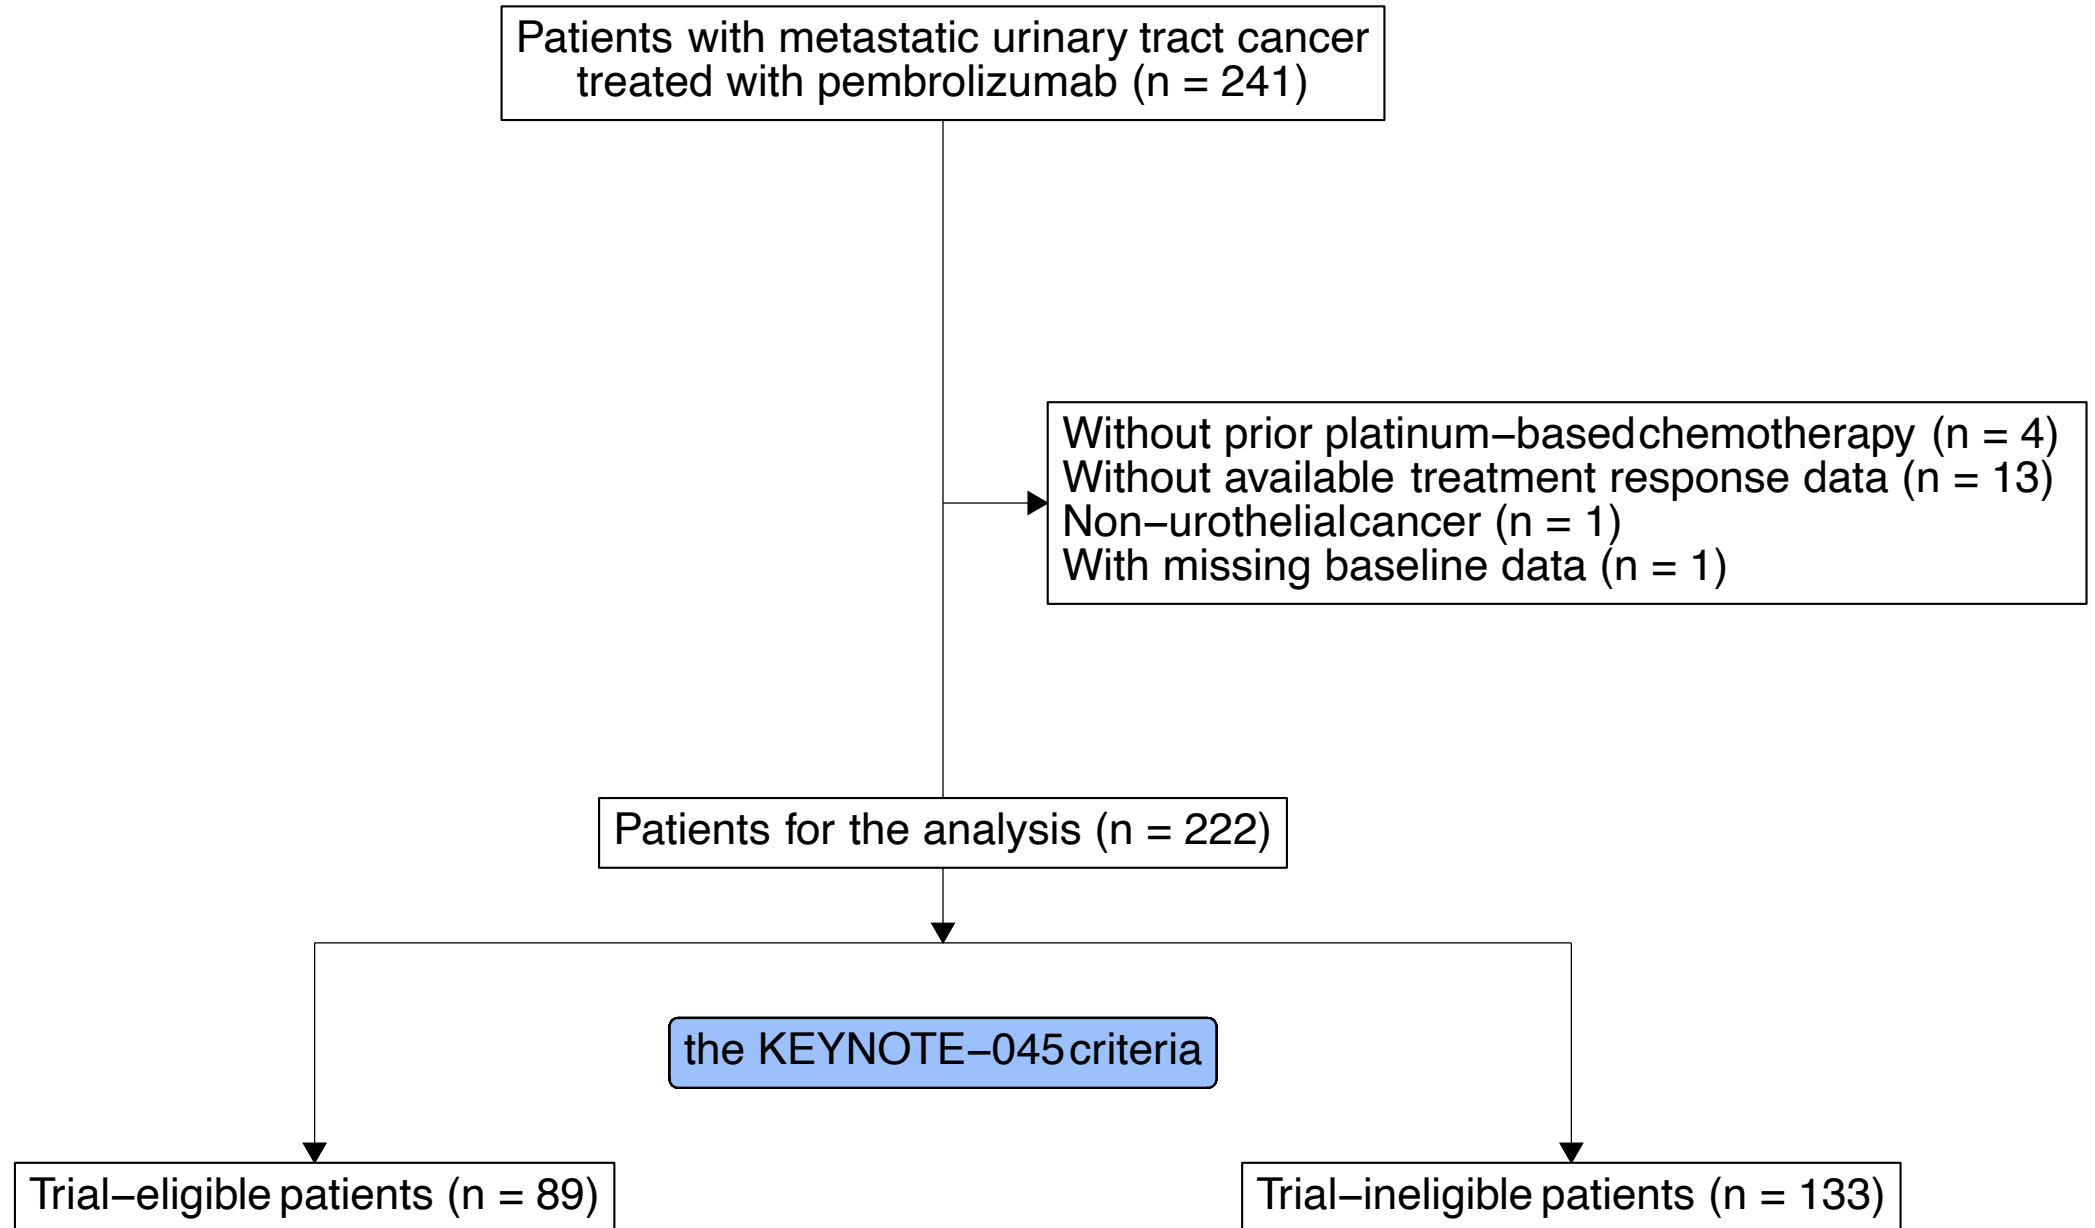

Supplement: Supplementary file 3 [file b98628817a1e0416bfb7074a.pdf]
